# Supplementary material for: MiR-200c-3p targets SESN1 and represses the IL-6/AKT loop to prevent cholangiocyte activation and cholestatic liver fibrosis
Source: PubMed Central journal article supplement (PMC9042705; doi:10.1038/s41374-021-00710-6), 2021-12-08
Supplement: 41374_2021_710_MOESM1_ESM.pdf [file 41374_2021_710_MOESM1_ESM.pdf]

# **MiR-200c-3p targets SESN1 and represses the IL-6/AKT loop to prevent cholangiocyte activation and cholestatic liver fibrosis**

**Authors:** Yongfeng Song, Melanie Tran, Li Wang, Dong-Ju Shin, and Jianguo Wu

## **Supporting Information**

### **Contents**

|                                                                            |           |
|----------------------------------------------------------------------------|-----------|
| <b>Supporting Fig. 1</b> .....                                             | <b>2</b>  |
| <b>Supporting Fig. 2</b> .....                                             | <b>3</b>  |
| <b>Supporting Fig. 3</b> .....                                             | <b>4</b>  |
| <b>Supporting Fig. 4</b> .....                                             | <b>5</b>  |
| <b>Supporting Fig. 5</b> .....                                             | <b>6</b>  |
| <b>Supporting Fig. 6</b> .....                                             | <b>7</b>  |
| <b>Supporting Fig. 7</b> .....                                             | <b>8</b>  |
| <b>Supporting Fig. 8</b> .....                                             | <b>9</b>  |
| <b>Supporting Fig. 9</b> .....                                             | <b>10</b> |
| <b>Supporting Fig. 10</b> .....                                            | <b>11</b> |
| <b>Supporting Fig. 11</b> .....                                            | <b>12</b> |
| <b>Supporting Fig. 12</b> .....                                            | <b>13</b> |
| <b>Supporting Fig. 13</b> .....                                            | <b>14</b> |
| <b>Supporting Fig. 14</b> .....                                            | <b>15</b> |
| <b>Supplementary Materials and Methods</b> .....                           | <b>16</b> |
| <b>References</b> .....                                                    | <b>17</b> |
| <b>Supporting Table 1. Primers used in the study.</b> .....                | <b>18</b> |
| <b>Supporting Table 2. The information of human liver specimens.</b> ..... | <b>20</b> |

## Supporting Fig. 1

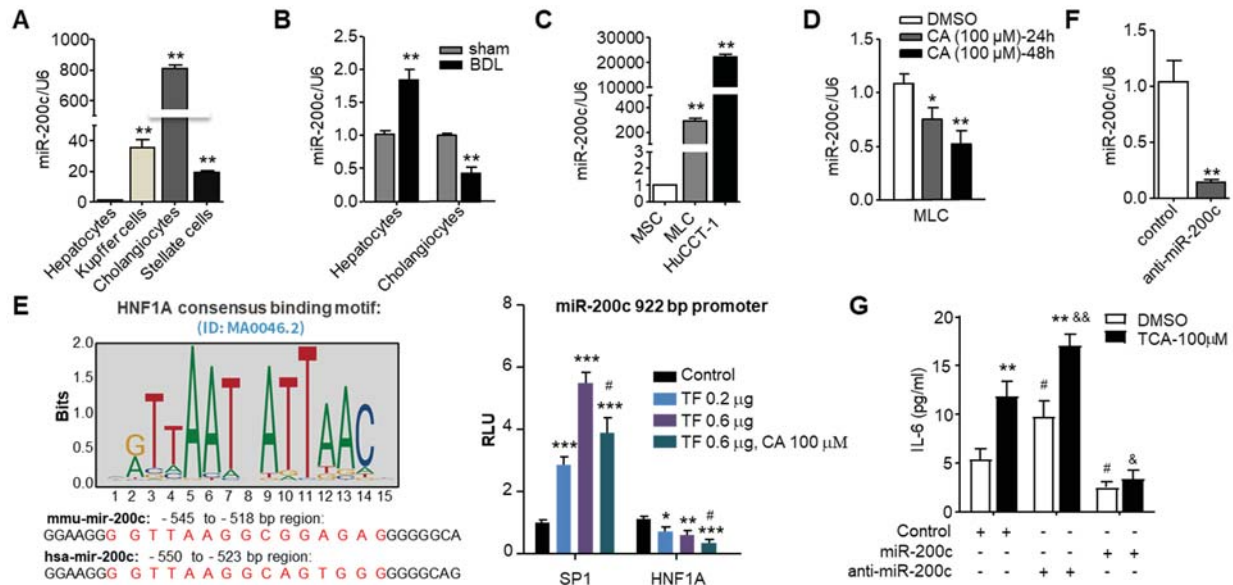

**Fig. S1A:** qPCR of miR-200c expression levels in primary cells isolated from WT mouse livers.  $**P < 0.01$  vs hepatocytes.

**Fig. S1B:** qPCR of miR-200c expression levels in hepatocytes and cholangiocytes isolated from WT-sham and WT-BDL mice. The results are the same as in main Fig. 1A but are plotted as fold changes with sham group set as 1.  $**P < 0.01$  vs sham.

**Fig. S1C:** qPCR of miR-200c expression levels in MSC, MLC, and HuCCT-1 cells.  $**P < 0.01$  vs MSC.

**Fig. S1D:** qPCR of miR-200c expression levels in MLC cells treated with CA.  $*P < 0.05$  &  $**P < 0.01$  vs DMSO.

**Fig. S1E:** HNF1A potentially binds and inhibits miR-200c promoter activity. Left: A HNF1A consensus binding motif was retrieved from JASPAR database. The predicted binding sites of HNF1A in the mouse and human miR-200c promoters are in red. Right: Luciferase assay showing that HNF1A inhibited miR-200c promoter activity in MLC cells without or with CA treatment. Data are shown as mean ± SEM (triplicate assays). Specificity protein 1 (SP1) was used as a positive control. TF, transcription factor SP1 or HNF1A.  $*P < 0.05$ ,  $**P < 0.01$  &  $***P < 0.001$  vs control;  $\#P < 0.05$  vs TF 0.6 μg.

**Fig. S1F:** qPCR of miR-200c expression levels in MLC cells transfected with control or miR-200c inhibitor (anti-miR-200c) plasmid for 24 hrs.  $**P < 0.01$  vs control.

**Fig. S1G:** ELISA of IL-6 secretion from MLC cells which were transfected with plasmids of control miRNA, miR-200c, or anti-miR-200c, and then treated with DMSO or TCA (100 μM) for 48 hrs. Data are shown as mean ± SEM (triplicate assays).  $**P < 0.01$  TCA-100 μM vs DMSO;  $\#\#P < 0.01$  vs control-DMSO;  $\&P < 0.05$  &  $\&\&P < 0.01$  vs control-TCA-100 μM.

Supporting Fig. 2

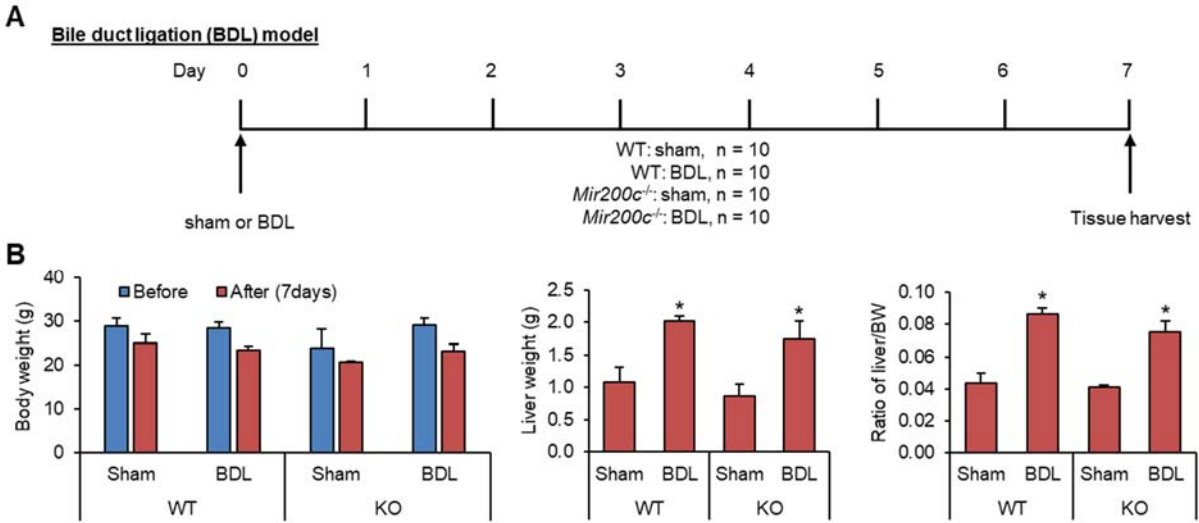

**Fig. S2A:** The diagram showing the mouse BDL model used in this study. Considering that some mice may not survive from BDL surgery for various reasons, we used 10 mice/group.

**Fig. S2B:** The body and liver weight of *Mir200c*<sup>+/+</sup> (WT) and *Mir200c*<sup>-/-</sup> (KO) mice before and after BDL. Data are shown as mean ± SEM. \**P* < 0.05 vs sham.

Supporting Fig. 3

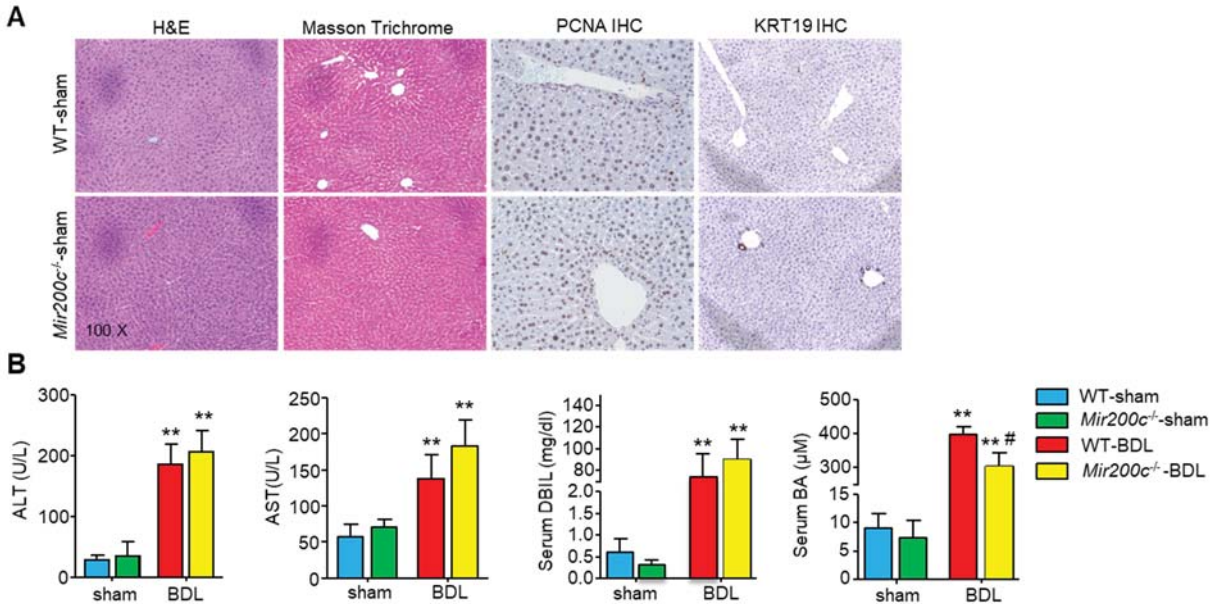

**Fig. S3A:** Representative images of H&E, Masson Trichrome, and IHC of PCNA and KRT19 staining of liver sections in the sham groups of WT and *Mir200c*<sup>-/-</sup> mice.

**Fig. S3B:** Serum ALT, AST, DBIL, and BA levels in WT and *Mir200c*<sup>-/-</sup> mice after sham or BDL surgery. Data are shown as mean ± SEM (n = 10/group). \*\**P* < 0.01 vs sham; #*P* < 0.05 vs WT-BDL.

Supporting Fig. 4

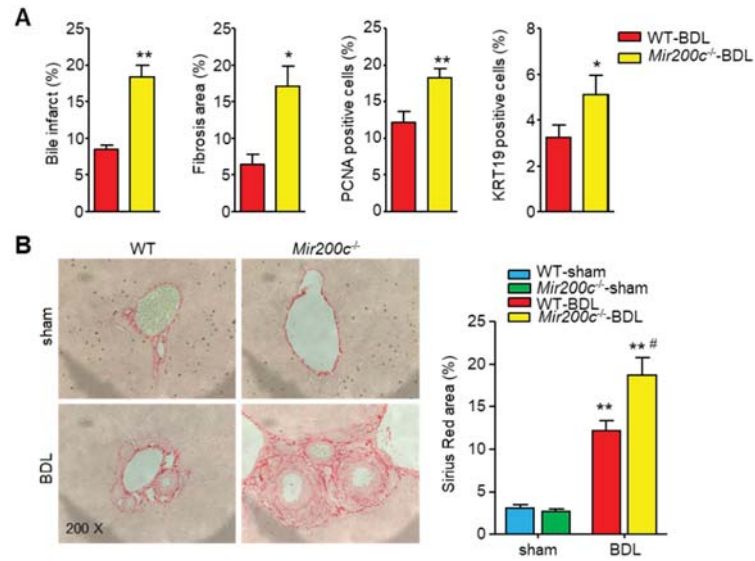

**Fig. S4A:** Quantification of the bile infarct area in BDL-mice and the results in main Fig. 2A. Five fields of view per slide per mouse liver were randomly taken under a microscope and quantified by ImageJ. n = 10 mice/group. \* $P < 0.05$  & \*\* $P < 0.01$  vs WT-BDL.

**Fig. S4B:** Representative images of Sirius Red staining of liver sections from WT and *Mir200c*<sup>-/-</sup> mice under sham or BDL surgery. The quantification was the same as Fig. S4A. n = 10 mice/group. \*\* $P < 0.01$  vs sham; # $P < 0.05$  vs WT-BDL.

Supporting Fig. 5

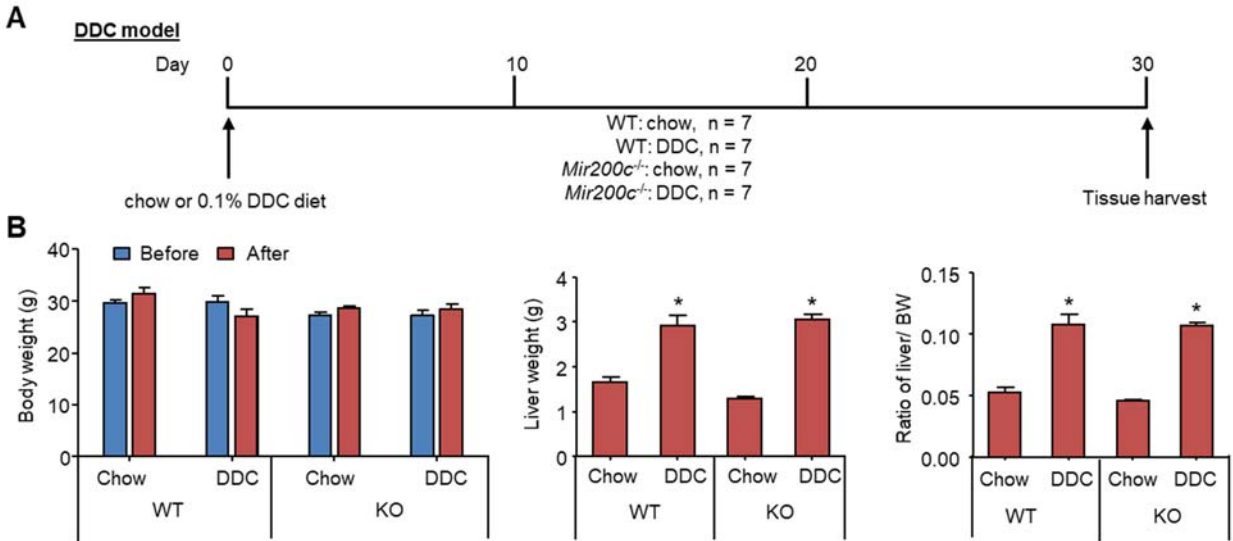

**Fig. S5A:** The diagram showing the DDC-feeding model used in this study.

**Fig. S5B:** The body and liver weight of *Mir200c*<sup>+/+</sup> (WT) and *Mir200c*<sup>-/-</sup> (KO) mice before and after DDC feeding. Data are shown as mean  $\pm$  SEM. \**P* < 0.05 vs chow.

Supporting Fig. 6

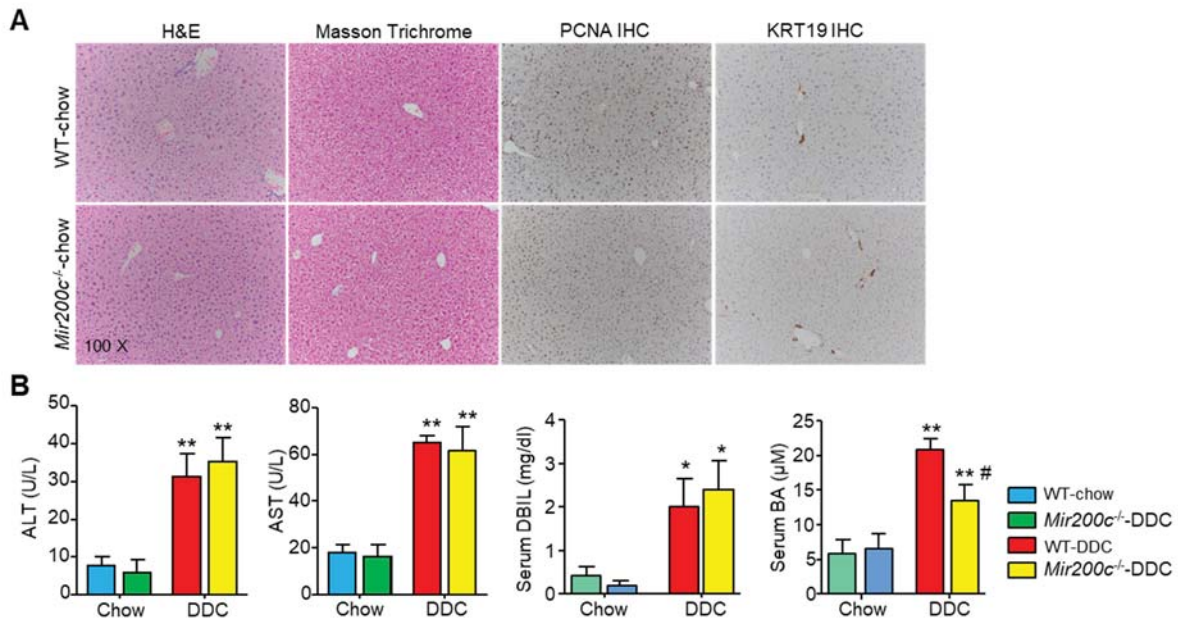

**Fig. S6A:** Representative images of H&E, Masson Trichrome, and IHC of PCNA and KRT19 IHC staining of liver sections in control chow groups of WT and *Mir200c*<sup>-/-</sup> mice.

**Fig. S6B:** Serum ALT, AST, DBIL, and BA levels in chow and DDC groups of WT and *Mir200c*<sup>-/-</sup> mice. Data are shown as mean ± SEM (n = 7/group). \**P* < 0.05 & \*\**P* < 0.01 vs chow; #*P* < 0.05 vs WT-DDC.

Supporting Fig. 7

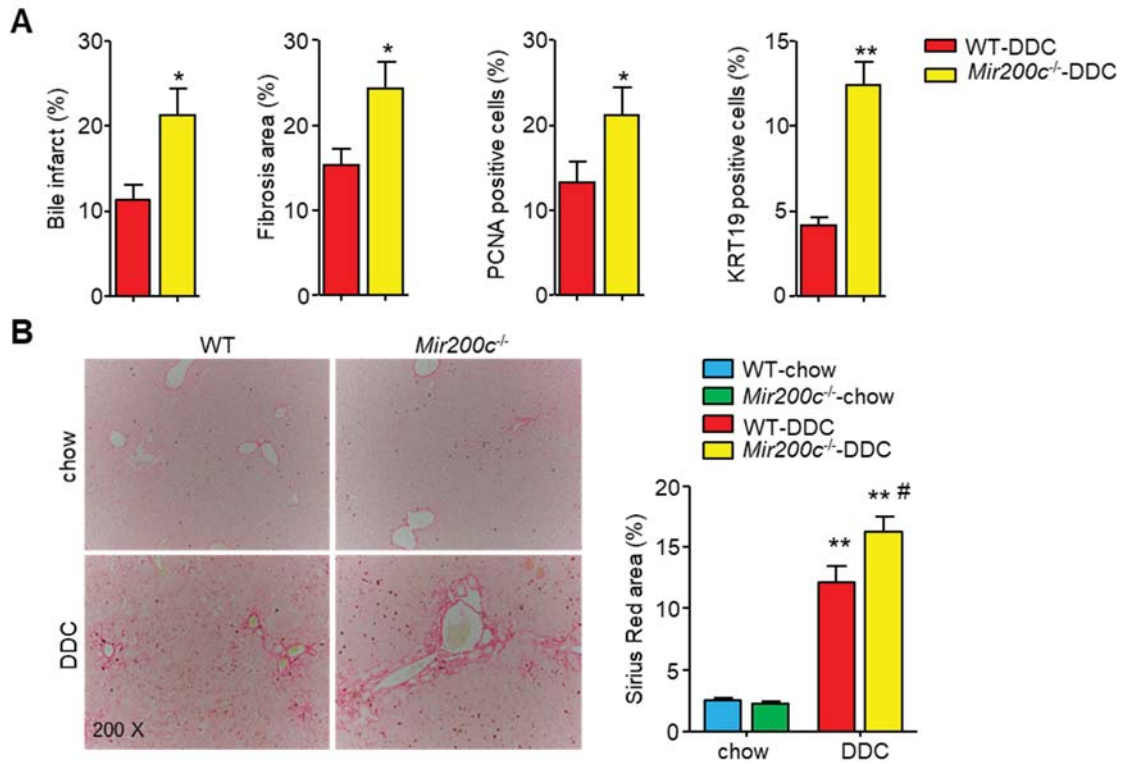

**Fig. S7A:** Quantification of the bile infarct area in DDC-fed mice and the results in main Fig. 2B. Five fields of view per slide per mouse liver were randomly taken under a microscope and quantified by ImageJ. n = 7 mice/group. \* $P < 0.05$  & \*\* $P < 0.01$  vs WT-DDC.

**Fig. S7B:** Representative images of Sirius Red staining of liver sections of WT and *Mir200c*<sup>-/-</sup> mice fed a chow or DDC diet for 1 month. The quantification was the same as Fig. S7A. n = 7 mice/group. \*\* $P < 0.01$  vs chow; # $P < 0.05$  vs WT-DDC.



Supporting Fig. 8

MFE (minimum free energy)-human SESN1

dataset: 1  
Target: *gi|315709499|ref|NM\_001199933.1|*  
length: 1124  
MiRNA: *hsa-miR-200c-3p*  
length: 23

mfe: -19.7 kcal/mol  
p-value: 1.000000e+00

Position: 1054  
target 5' G            GUAUUA            U            3'  
                  UCUGUCA            CUGGUA  
                  AGGUAGU            GGCCGU  
miRNA 3'            AAUG            CAUAAU 5'

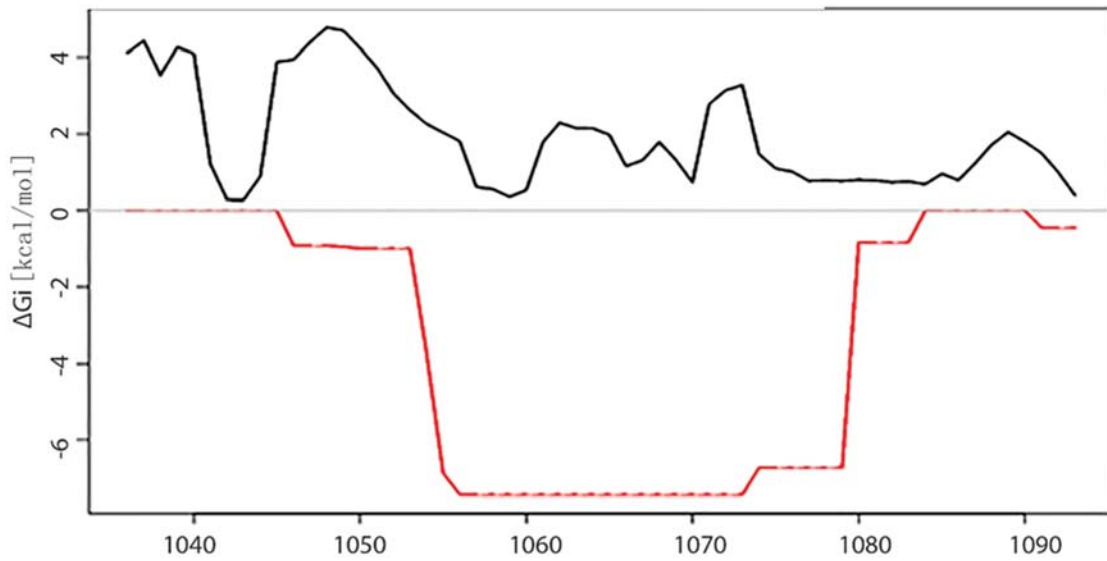

Fig. S8: The free energy value of miR-200c binding to human SESN1 3'-UTR.

Supporting Fig. 9

**MFE (minimum free energy)-mouse SESN1**

dataset: 1  
target: NM\_001013370.2  
length: 965  
miRNA : mmu-miR-200c-3p  
length: 23

mfe: -23.9 kcal/mol  
p-value: 1.000000e+00

position 424  
target 5' C A AG GUGU A 3'  
UC GUCA ACC UGGCGGUA  
AG UAGU UGG GCCGUCAU  
miRNA 3' G AA AAU 5'

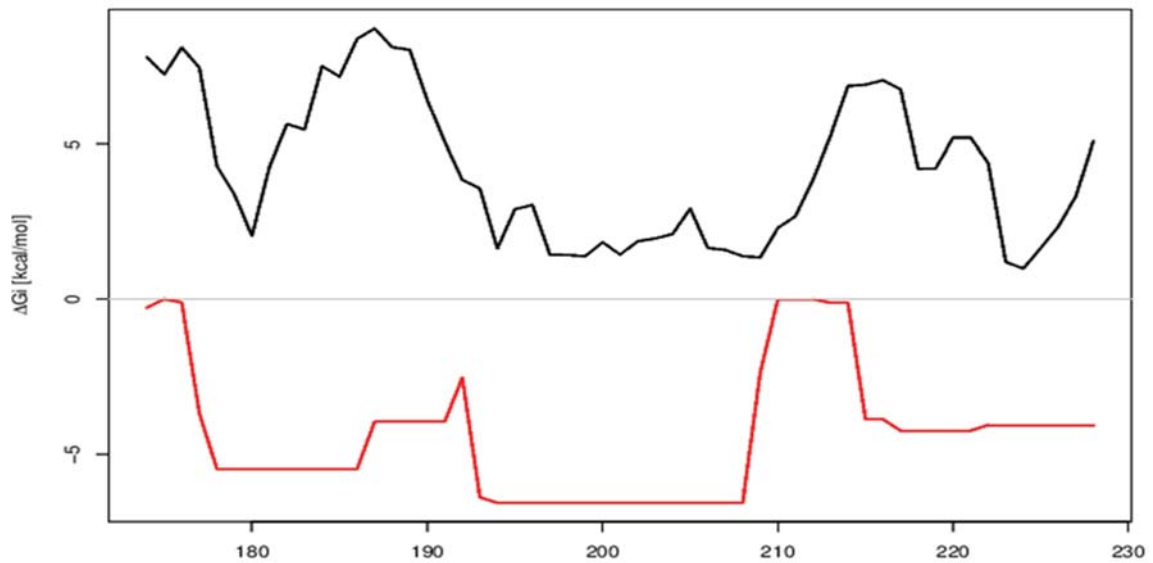

**Fig. S9:** The free energy value of miR-200c binding to mouse SESN1 3'-UTR.

## Supporting Fig. 10

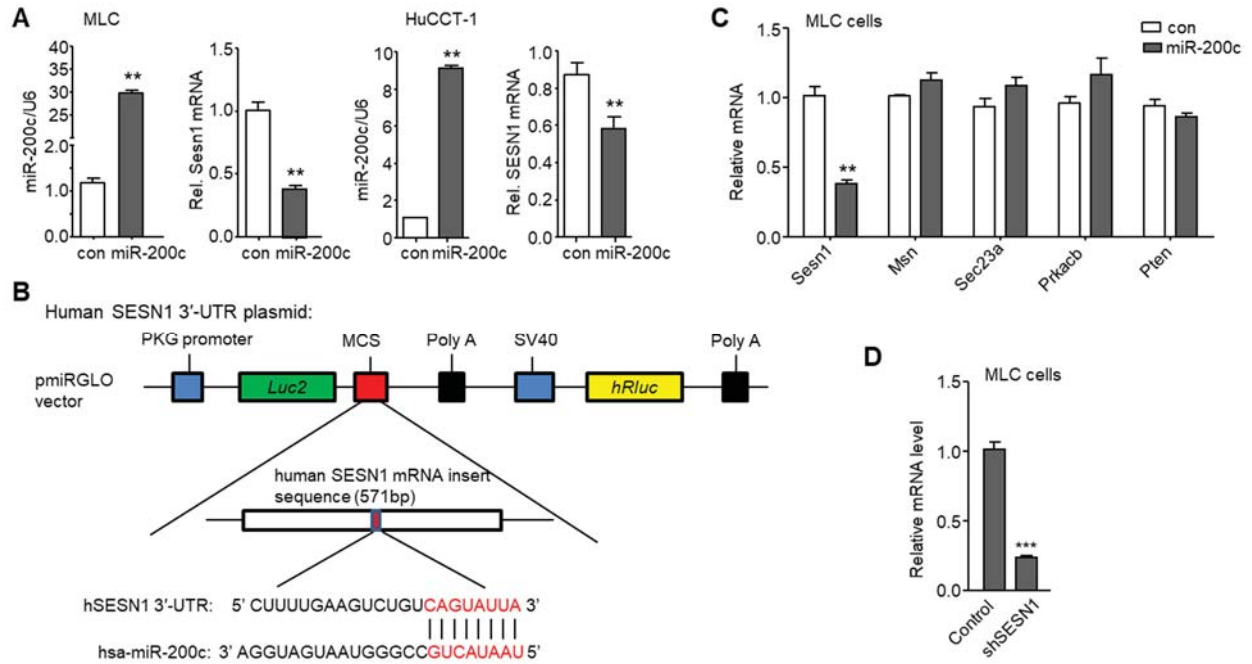

**Fig. S10A:** qPCR of miR-200c and SESN1 mRNA levels in MLC and HuCCT-1 cells transfected with control (con) or miR-200c expression plasmids. \*\* $P < 0.01$  vs con.

**Fig. S10B:** The diagram showing the cloning of the human SESN1 (hSESN1) 3'-UTR luciferase reporter.

**Fig. S10C:** qPCR of mRNA levels of the predicted miR-200c target genes in MLC cells transfected with control (con) or miR-200c expression plasmids. \*\* $P < 0.01$  vs con.

**Fig. S10D:** qPCR of SESN1 mRNA levels in MLC cells transfected with control or SESN1 shRNAs. \*\*\* $P < 0.001$  vs control.

Supporting Fig. 11

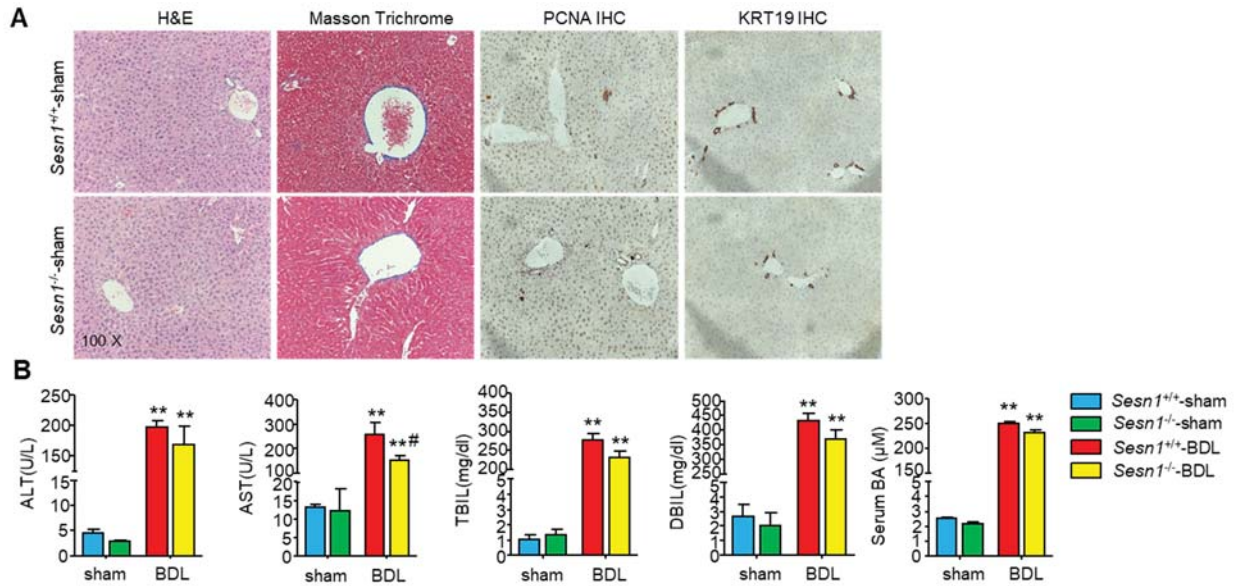

**Fig. S11A:** Representative images of H&E, Masson Trichrome, and IHC of PCNA and KRT19 staining of liver sections in sham groups of *Sesn1*<sup>+/+</sup> and *Sesn1*<sup>-/-</sup> mice.

**Fig. S11B:** Serum ALT, AST, TBIL, DBIL, and BA levels in sham and BDL groups of *Sesn1*<sup>+/+</sup> and *Sesn1*<sup>-/-</sup> mice. Data are shown as mean ± SEM (n=10/group). \*\**P* < 0.01 vs sham; #*P* < 0.05 vs *Sesn1*<sup>+/+</sup>-BDL.

## Supporting Fig. 12

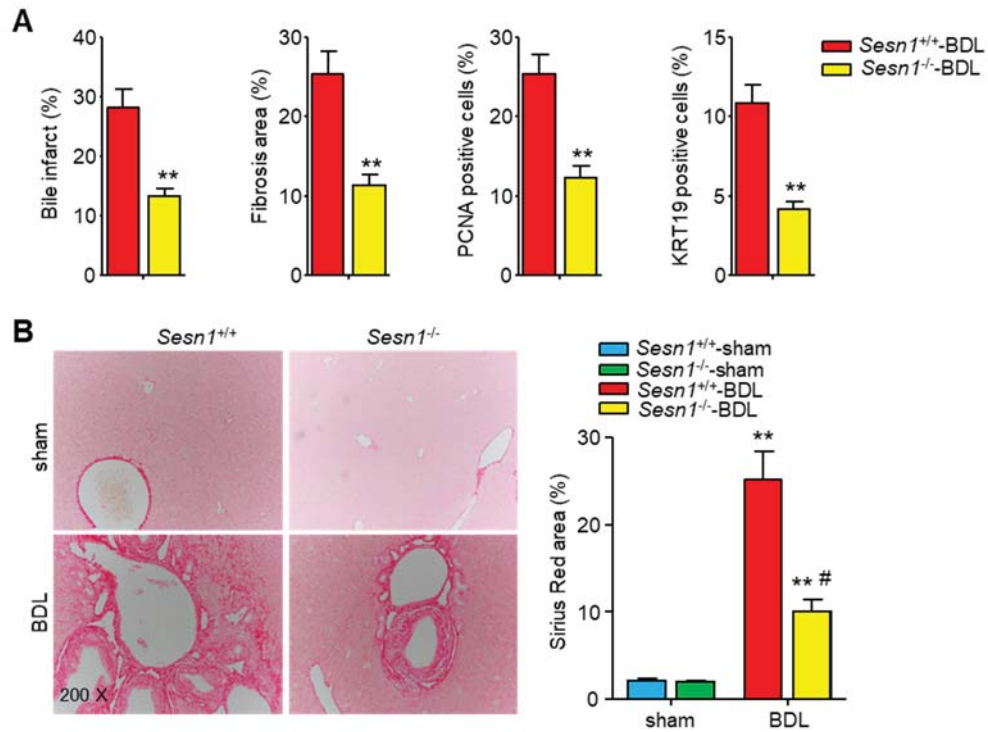

**Fig. S12A:** Quantification of the bile infarct area in BDL-mice and the results in main Fig. 4A. Five fields of view per slide per mouse liver were randomly taken under a microscope and quantified by ImageJ. n = 10 mice/group. \*\* $P < 0.01$  vs *Sesn1*<sup>+/+</sup>-BDL.

**Fig. S12B:** Representative images of Sirius Red staining of liver sections from *Sesn1*<sup>+/+</sup> and *Sesn1*<sup>-/-</sup> mice under sham or BDL surgery. The quantification was the same as Fig. S12A. n = 10 mice/group. \*\* $P < 0.01$  vs sham; # $P < 0.05$  vs *Sesn1*<sup>+/+</sup>-BDL.

## Supporting Fig. 13

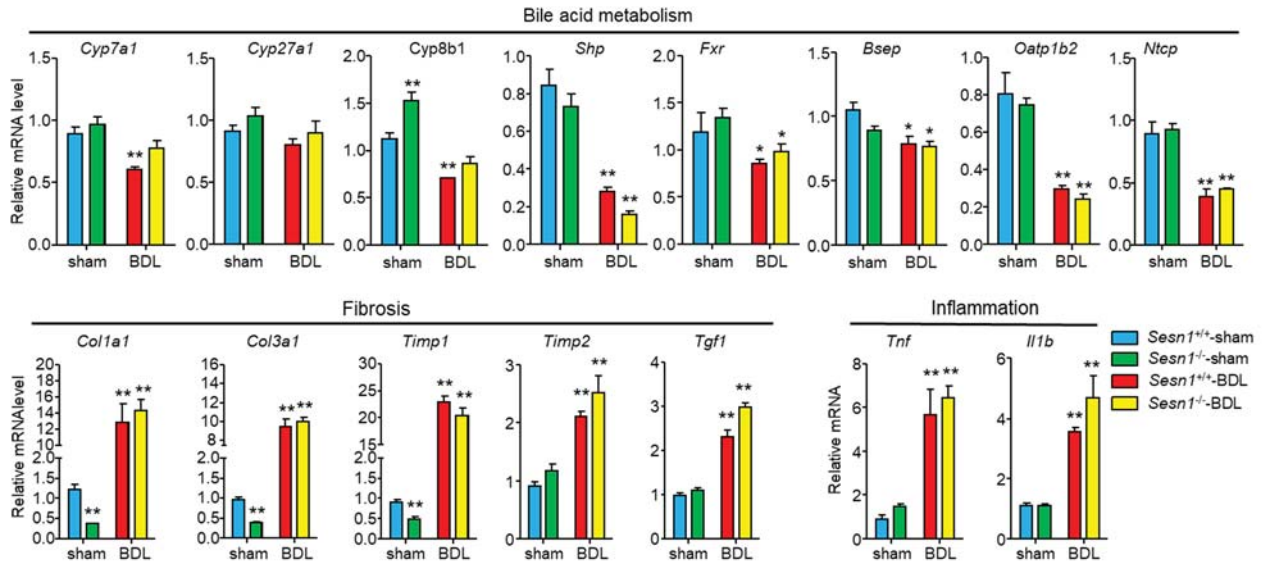

**Fig. S13:** qPCR of gene expression in several pathways in *Sesn1*<sup>+/+</sup> and *Sesn1*<sup>-/-</sup> mice under sham or BDL surgery for one week. Data are shown as mean  $\pm$  SEM (n = 10/group). \* $P$  < 0.05 & \*\* $P$  < 0.01 vs sham.

## Supporting Fig. 14

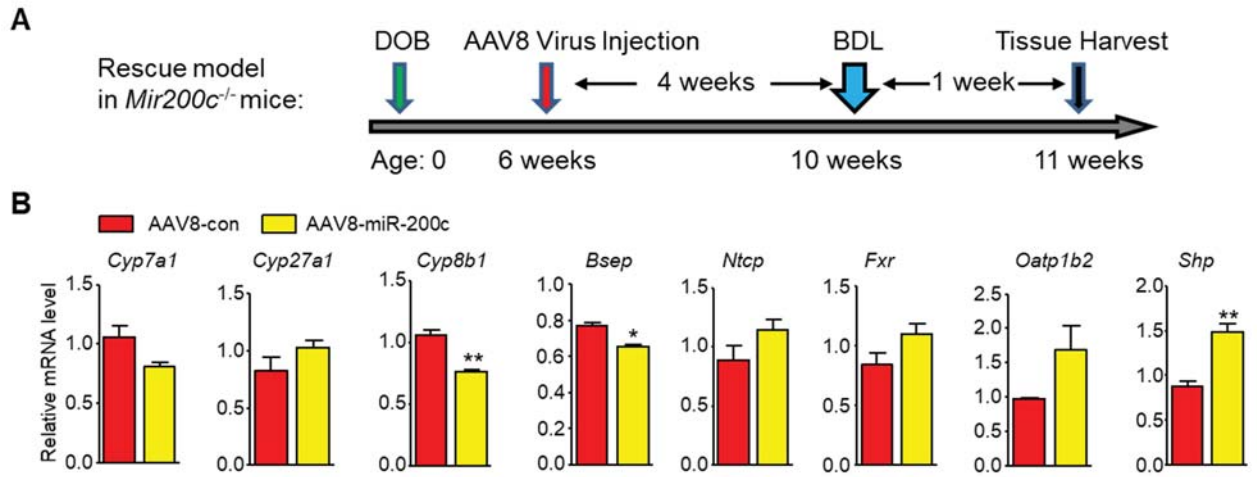

**Fig. S14A:** The diagram showing the mouse model used for miR-200c rescue experiment. *Mir200c*<sup>-/-</sup> mice were transduced with AAV8-miR-200c or AAV8-con (control) for 1 month via tail vein-injection followed by BDL for 7 days.

**Fig. S14B:** qPCR of gene expression in several pathways in mouse livers from the rescue experiment. Data are shown as mean  $\pm$  SEM (n = 5 mice/group). \* $P$  < 0.05 & \*\* $P$  < 0.01 vs AAV8-con.

## **Supplementary Materials and Methods**

### ***Human liver specimens***

The coded human liver specimens of normal controls, primary sclerosing cholangitis (PSC), primary biliary cholangitis (PBC), and congenital hepatic fibrosis (CHF) were obtained through the Liver Tissue Cell Distribution System (Minneapolis, Minnesota) which was funded by NIH (Contract # HSN276201200017C). Because we did not ascertain individual identities associated with the samples, the Institutional Review Board for Human Research at the University of Connecticut determined that the project was not research involving human subjects. The basic demographic characteristics are listed in Supporting Table 2.

### ***Cell lines, plasmids, and antibodies***

Culture conditions of mouse small cholangiocytes (MSC), mouse large cholangiocytes (MLC), human cholangiocarcinoma cell line (HuCCT-1), and human embryonic kidney 293T cells were described previously [1, 2]. MiR-200c overexpression plasmid was obtained from Cell Biolabs. SP1 (#12097) and HNF1A (#31104) plasmids were originally from Addgene. SESN1 3'UTR was cloned into pmirGlo (Promega) to obtain a luciferase reporter construct. The SESN1 3'UTR mutant plasmid was constructed using Q5 Site-Directed Mutagenesis Kit (NEB). The luciferase reporters containing upstream fragments of miR-200c (- 3 kb and - 922 bp) were described previously [3]. SESN1 shRNA (TRCN0000087812) was from MilliporeSigma. Antibodies were purchased from Sigma-Aldrich ( $\alpha$ -SMA), Cell Signaling (p-AKT, AKT, p-ERK1/2, ERK1/2, p-JNK1/2, JNK1/2,  $\beta$ -actin), GeneTex (SESN1), and Santa Cruz ( $\alpha$ -tubulin) [2, 4].

### ***BrdU incorporation***

Cell proliferation was measured using the BrdU-ELISA kit purchased from MilliporeSigma. In brief, MLC cells were seeded at a 50-60% confluency into 96-well plates and transfected with plasmids. After 24 hr, cells were washed with starvation medium and incubated with either



growth medium (positive control), starvation medium (background control and negative control), or starvation medium supplemented with CA for 24 hr. Subsequently, fresh medium containing bromodeoxyuridine (BrdU) was added to wells except the background control. After 24 hr, the BrdU-ELISA was carried out according to the manufacturer's protocol.

## References

- 1 Song Y, Liu C, Liu X, Trottier J, Beaudoin M, Zhang L, et al. H19 promotes cholestatic liver fibrosis by preventing ZEB1-mediated inhibition of epithelial cell adhesion molecule. *Hepatology* **66**, 1183-1196 (2017).
- 2 Wu J, Zhao Y, Park YK, Lee JY, Gao L, Zhao J, et al. Loss of PDK4 switches the hepatic NF-kappaB/TNF pathway from pro-survival to pro-apoptosis. *Hepatology* **68**, 1111-1124 (2018).
- 3 Zhang Y, Yang Z, Whitby R, Wang L. Regulation of miR-200c by nuclear receptors PPARalpha, LRH-1 and SHP. *Biochem Biophys Res Commun* **416**, 135-139 (2011).
- 4 Tran M, Lee SM, Shin DJ, Wang L. Loss of miR-141/200c ameliorates hepatic steatosis and inflammation by reprogramming multiple signaling pathways in NASH. *JCI Insight* **2**, e96094 (2017).

**Supporting Table 1. Primers used in this study.**

| Name                 | Forward                   | Reverse                  |
|----------------------|---------------------------|--------------------------|
| <b>qPCR primers</b>  |                           |                          |
| miR-200c             | GTGCAGGGTCCGAGGT          | CGCTAATACTGCCGGTAATG     |
| miR-141              | GTGCAGGGTCCGAGGT          | GCCCGCTAACACTGTCTGGTAAAG |
| Mouse Acta2 (a-SMA)  | AGAGTTACGAGTTGCCTGATG     | ATGAAGGATGGCTGGAACAG     |
| Mouse Timp1          | ATCAAGGCTGTGGGAAATG       | CTCAGAGTACGCCAGGGAAC     |
| Mouse Timp2          | TCCTTGCTACAGGCAGGAGT      | CATTCGCTGAAGTCTGTGGA     |
| Mouse col1a1         | GACGCCATCAAGGTCTACTGC     | GGAAGGTCAGCTGGATAGCG     |
| Mouse col1a2         | AAGGATACAGTGGATTGCAGG     | TCTACCATCTTTGCCAACGG     |
| Mouse Col3a1         | TGGTCCTCAGGGTGTAAGG       | GTCCAGCATCACCTTTTGGT     |
| Mouse Il6            | CATGTTCTCTGGGAAATCGTGG    | GTACTIONCAGGTAGCTATGGTAC |
| Mouse Il1b           | TGCCACCTTTTGACAGTGATG     | GCTGCGAGATTTGAAGCTGG     |
| Mouse Nlrp3          | ATGGTATGCCAGGAGGACAG      | ATGCTCCTTGACCAGTTGGA     |
| Mouse Tnf            | ACGGCATGGATCTCAAAGAC      | CGGACTCCGCAAAGTCTAAG     |
| Mouse Krt7 (Ck7)     | TGAGATTGCGGAGATGAACC      | CGATGCTGGACTCTAACTTGG    |
| Mouse Krt19 (Ck19)   | CTCCCAGATTACAACCACTAC     | GTTCTGTCTCAAACCTGGTTCTG  |
| Mouse Icam1          | AGATCACATTCACGGTGCTGGCTA  | AGCTTTGGGATGGTAGCTGGAAGA |
| Mouse Vcam1          | CTGGGGCAGGAAGTTAGATA      | CAAGAAAAGAAGGGGAGTCA     |
| Mouse Ccl2 (Mcp1)    | AGCAGGTGTCCCAAAGAAGCTGTA  | AAAGGTGCTGAAGACCTTAGGGCA |
| Mouse Ly6g           | GAGAGGAAGTTTTATCTGTGCAGC  | TCTCAGGTGGGACCCCAATA     |
| Mouse Ccl3 (Mip1a)   | ATTCCACGCCAATTCATCGT      | CAGGTCTCTTTGGAGTCAGC     |
| Mouse Ccl4 (Mip1b)   | TATGAGACCAGCAGTCTTTGC     | TCAACTCCAAGTCACTCATGT    |
| Mouse Sox9           | CAAGACTCTGGGCAAGCTC       | GGGCTGGTACTTGTAAATCGG    |
| Mouse PcnA           | TTTGAGGCACGCCTGATCC       | GGAGACGTGAGACGAGTCCAT    |
| Mouse Tgf1           | GTCAGACATTCGGAAGCAG       | GCGTATCAGTGGGGGTCA       |
| Mouse Adgre1 (F4/80) | TCAAATGGATCCAGAAGGCTCCCA  | TGCACTGCTTGGCATTGCTGTATC |
| Mouse Cd68           | GCTGTTACCTTGACCTGCTC      | GGTTGATTGTCGTCTGCGG      |
| Mouse Oatp1b2        | GGGAACATGCTTCGTGGGATA     | GCAGTTATGCGGACACTTCTC    |
| Mouse Bsep           | ATGTGACCTTCCATTATCCTTCTCG | GCTGTAGTGCTGTGCTCTTCC    |

|                                                         |                                                     |                               |
|---------------------------------------------------------|-----------------------------------------------------|-------------------------------|
| Mouse Ntcp                                              | TCATCTGCGGCTGCTCTCC                                 | TGGTCATCACAATGCTGAGGTTTC      |
| Mouse Sesn1                                             | CTGCTTTGGGTCGTCTGGAT                                | CTGCCGCCATGATTCCAATG          |
| Mouse Msn                                               | GCAGAATGACAGACTGACTCC                               | CGCTTGTTAATCCGAAGCCG          |
| Mouse Sec23a                                            | GGCAGATGCTCAAACCTCAAATC                             | GAGTTGTCTGTCCAACCATCTTA       |
| Mouse Prkacb                                            | TTCGGGTTCCGCAAAAAGAGT                               | CCAGTCCACCGCCTTATTGT          |
| Mouse Pten                                              | CCAGACATGACAGCCATCATCA                              | CTGCAGGAAATCCCATAGCAATA       |
| Mouse Cyp7a1                                            | GGGATTGCTGTGGTAGTGAGC                               | GGTTATGGAATCAACCCGTTGT        |
| Mouse Cyp27a1                                           | GGAGCCACGACCCTAGATG                                 | GCCATGCCAAGATAAGGAAGC         |
| Mouse Fxr                                               | GCTTGATGTGCTACAAAAGCT                               | CGTGGTGATGGTTGAATGTCC         |
| Mouse Cyp8b1                                            | CCTCTGGACAAGGGTTTTGTG                               | GCACCGTGAAGACATCCCC           |
| Mouse Shp                                               | CAGGTCGTCCGACTATTCTG                                | ACTTCACACAGTGCCAGTG           |
| Human CDKN2A                                            | CCAACGCACCGAATAGTTACG                               | GCGCTGCCCATCATCATG            |
| <b>Loading control</b>                                  |                                                     |                               |
| Mouse Hprt                                              | CGTCGTGATTAGCGATGATGA                               | CACACAGAGGGCCACAATGT          |
| Mouse/human U6                                          | CTCGCTTCGGCAGCACA                                   | AACGCTTCACGAATTTGCGT          |
| Human GAPDH                                             | GAAATCCCATCACCATCTTCCA                              | CAGCATCGCCCCACTTG             |
| <b>Cloning construct primers</b>                        |                                                     |                               |
| SESN1 3'-UTR plasmid                                    | CGCGAGCTCttaaactgcattatgtgtt                        | CCCTCGAGctttatttaaaaataaccagt |
| SESN1 3'-UTR mutant                                     | AATACCAGTAcgcCTGACAGACTTCAAAAGCAATTC                | TTTAAATAAAGCTCGAGTCTAG        |
| <b>Stem-loop primer for miRNA reverse transcription</b> |                                                     |                               |
| miR-200c                                                | GTCGTATCCAGTGCAGGGTCCGAGGTATTTCGCACTGGATACGACCCATCA |                               |

**Supporting Table 2. The information of human liver specimens.**

| <b>No.</b> | <b>Disease</b> | <b>Age (year)</b> | <b>Gender</b> | <b>Individual ID</b> |
|------------|----------------|-------------------|---------------|----------------------|
| 1          | Normal         | 47                | F             | HH-1220              |
| 2          | Normal         | 58                | F             | HH-1223              |
| 3          | Normal         | 56                | M             | HH-1234              |
| 4          | Normal         | 55                | F             | HH-1274              |
| 5          | Normal         | 36                | F             | HH-1280              |
| 6          | Normal         | 70                | M             | HH-1246              |
| 7          | Normal         | 59                | M             | HH-1249              |
| 8          | Normal         | 59                | M             | HH-1278              |
| 9          | Normal         | 50                | M             | HH-1287              |
| 10         | Normal         | 67                | F             | HH-1320              |
| 1          | PSC            | 32                | F             | UMN-1163             |
| 2          | PSC            | 57                | F             | UMN-1171             |
| 3          | PSC            | 34                | F             | UMN-1178             |
| 4          | PSC            | 22                | F             | UMN-1210             |
| 5          | PSC            | 51                | F             | UMN-1240             |
| 6          | PSC            | 27                | F             | UMN-1358             |
| 7          | PSC            | 53                | F             | UMN-1635             |
| 8          | PSC            | 63                | F             | UMN-1690             |
| 9          | PSC            | 41                | M             | UMN-1150             |
| 10         | PSC            | 51                | M             | UMN-1155             |
| 11         | PSC            | 52                | M             | UMN-1179             |
| 12         | PSC            | 55                | M             | UMN-1182             |
| 13         | PSC            | 25                | M             | UMN-1199             |
| 14         | PSC            | 41                | M             | UMN-1222             |
| 15         | PSC            | 50                | M             | UMN-1236             |
| 16         | PSC            | 38                | M             | UMN-1267             |
| 17         | PSC            | 62                | M             | UMN-1270             |
| 18         | PSC            | 32                | M             | UMN-1307             |
| 19         | PSC            | 38                | M             | UMN-1315             |
| 20         | PSC            | 58                | M             | UMN-1339             |
| 21         | PSC            | 59                | M             | UMN-1363             |
| 22         | PSC            | 48                | M             | UMN-1383             |
| 23         | PSC            | 53                | M             | UMN-1465             |
| 24         | PSC            | 58                | M             | UMN-1489             |
| 25         | PSC            | 47                | M             | UMN-1520             |
| 26         | PSC            | 61                | M             | UMN-1534             |
| 27         | PSC            | 43                | M             | UMN-1560             |
| 28         | PSC            | 60                | M             | UMN-1600             |
| 29         | PSC            | 33                | M             | UMN-1614             |
| 30         | PSC            | 51                | M             | UMN-1645             |

|    |     |         |         |          |
|----|-----|---------|---------|----------|
| 31 | PSC | 58      | M       | UMN-1518 |
| 1  | PBC | 58      | F       | UMN-1006 |
| 2  | PBC | 63      | F       | UMN-1038 |
| 3  | PBC | 62      | F       | UMN-1054 |
| 4  | PBC | 55      | F       | UMN-1064 |
| 5  | PBC | 60      | F       | UMN-1173 |
| 6  | PBC | 59      | F       | UMN-1183 |
| 7  | PBC | 46      | F       | UMN-1213 |
| 8  | PBC | 59      | F       | UMN-1218 |
| 9  | PBC | 46      | F       | UMN-1234 |
| 10 | PBC | 52      | F       | UMN-1269 |
| 11 | PBC | 48      | F       | UMN-1374 |
| 12 | PBC | 64      | F       | UMN-1448 |
| 13 | PBC | 65      | F       | UMN-1490 |
| 14 | PBC | 60      | F       | UMN-1595 |
| 15 | PBC | 63      | F       | UMN-1682 |
| 16 | PBC | 62      | M       | UMN-1003 |
| 17 | PBC | 63      | M       | UMN-1292 |
| 18 | PBC | 35      | M       | UMN-1378 |
| 19 | PBC | 65      | M       | UMN-1388 |
| 20 | PBC | 67      | M       | UMN-1441 |
| 21 | PBC | 52      | M       | UMN-1679 |
| 1  | CHF | 13.14   | M       | UMN-916  |
| 2  | CHF | 13.1    | M       | UMN-1025 |
| 3  | CHF | 7.42    | M       | UMN-1028 |
| 4  | CHF | 1.79    | F       | UMN-1120 |
| 5  | CHF | unknown | unknown | UMN-742  |
